# Supplementary material
Source: PubMed Central journal article supplement (PMC6077977)
Supplement: NIHMS950551-supplement.pdf [file NIHMS950551-supplement.pdf]

## Supplemental Data

**Supplemental Table 1.** Primer sequences for gene expression experiments.

| Gene           | Forward primer (5'-3')<br>Reverse primer (5'-3')         | T <sub>m</sub> | References |
|----------------|----------------------------------------------------------|----------------|------------|
| <i>actb</i>    | CAACAGAGAGAAGATGACACAGATCA<br>GTCACACCATCACCAGAGTCCATCAC | 65             | [44]       |
| <i>gclc</i>    | AACCGACACCCAAGATTGAGCACT<br>CCATCATCCTCTGGAAACACCTCC     | 60             | [45]       |
| <i>ggt1b</i>   | ATCAATGCTCGTGAGACAGC<br>TGGACAAACCACCTTTCTGG             | 60             | [3]        |
| <i>gstA1</i>   | TCACACCTGCCGAAAACAAAG<br>CCACGAGGAAAGAAGAGTTTGC          | 65             | [46]       |
| <i>gstP1</i>   | CGACTTGAAAGCCACCTGTGTC<br>CTGTTCGTTTTTGCCATATGCAGC       | 67             | [8]        |
| <i>keap1a</i>  | CCGGTTGTCCCCGTCAAACC<br>CCGGTTGTCCCCGTCAAACC             | 65             |            |
| <i>keap1b</i>  | CCAGATCGACAGCGTGGTTC<br>CCTGGCTGAAGTTCATGTAG             | 65             |            |
| <i>nrf1a</i>   | CCAGAGTTGACAGGTCTCTGG<br>CATAACCTGTGATTCCATGATAGAC       | 64             | [41]       |
| <i>nrf1b</i>   | GCAGGACATGGAGGTGAACAATACG<br>GGATCGTGGGAGCCAAAATTTC      | 66             | [41]       |
| <i>nrf2a</i>   | GAGCGGGAGAAATCACACAGAATG<br>CAGGAGCTGCATGCACTCATCG       | 65             | [8]        |
| <i>nrf2b</i>   | GGCAGAGGGAGGAGGAGACCAT<br>AAACAGCAGGGCAGACAACAAGG        | 68             | [8]        |
| <i>nrf3</i>    | GCATGAGGATTTAGTGGTTAGTGG<br>GGAGTCAAATCATCAAAGTCAG       | 64             | [41]       |
| <i>p53</i>     | CCCGGATGGAGATAACTTG<br>CACAGTTGTCCATTCAGCAC              | 60             | [47]       |
| <i>pparaa</i>  | TCCACATGAACAAAGCCAAA<br>AGCGTACTGGCAGAAAAGGA             | 62             | [48]       |
| <i>pparg</i>   | CTGCCGCATACACAAGAAGA<br>TCACGTCACTGGAGAACTCG             | 62             | [48]       |
| <i>apoA1a</i>  | CCTGGACGGAACCGACTAT<br>GAGCTTGGTCAGGCTCTCAG              | 59             | [49]       |
| <i>fabp1a</i>  | CCGGATGATGAGGTGAGAGAAA<br>TCGCCACAGTGAAGGAGTA            | 61             | [37]       |
| <i>fabp1b1</i> | AACTGGTCAACTCTGACG<br>AAGTCTTGCGTGTGTTGCT                | 60             | [37]       |
